# Supplementary material
Source: PubMed Central journal article supplement (PMC3030392)
Supplement: supp_M110.162511_jbc.M110.162511-3.pdf [file supp_M110.162511_jbc.M110.162511-3.pdf]

### Supplementary table 1: ShRNA oligo sequences

| Oligonucleotide | Sequence 5'-3'                                                                |
|-----------------|-------------------------------------------------------------------------------|
| DBD-p63 forward | 5'GATCCCCAACCATGAGCTGAGCCGTGAATTTTCAAGAGAAATTCACGGCTCAGCTCATGGTTTTTTTTGGAAA3' |
| DBD-p63 reverse | 5'AGCTTTTCCAAAAAACCATGAGCTGAGCCGTGAATTTCTCTTGAAAATTCACGGCTCAGCTCATGGTTGGG 3'  |
| p63-UTR forward | 5'GATCCCCACATGTGAGTGACGATGATTTCAAGAGAATCATCGTCACTCACATGTTTTTTGGAAA3'          |
| p63-UTR reverse | 5'AGCTTTTCCAAAAACATGTGAGTGACGATGATTTCTCTTGAAATCATCGTCACTCACATGTGGG3'          |
| p53 forward     | 5'GCTTTTCCAAAAAGACTCCAGTGGTAATCTACTCTCTTGAAGTAGATTACCACTGGAGTCGGG3'           |
| p53 reverse     | 5' AGCTTTTCCAAAAAGACTCCAGTGGTAATCTACTCTCTTGAAGTAGATTACCACTGGAGTCGGG3'         |

### Supplementary table 2: Primers for $\Delta$ Np63 $\alpha$

| Oligonucleotide                 | Sequence 5'-3'                                     |
|---------------------------------|----------------------------------------------------|
| $\Delta$ Np63 $\alpha$ forward  | 5' GGATCCTCGCCATGTTGTACCTGGAAAACAA3'               |
| p63 $\alpha$ -HA tagged reverse | 5' TGAGAGCTCGAGTCATTAAGCGTAATCTGGAACATCGTATGGGTA3' |

### Supplementary table 3: Primers for site-directed mutagenesis

| Site-directed mutagenesis Oligonucleotide | Sequence 5'-3'                                     |
|-------------------------------------------|----------------------------------------------------|
| DBD- p63 forward                          | 5' CGGTGCCCCAACCATGAACTTAGTCGAGAATTCAACGAGGGACAG3' |
| DBD-p63 reverse                           | 5' CTGTCCCTCGTTGAATTCTCGACTAAGTTCATGGTTGGGGCACCG3' |

### Supplementary table 4: siRNA sequences

| siRNA    | Sequence                               |
|----------|----------------------------------------|
| ScrGFP   | Sense 5'GCAGCACGACUUCUUCAAGdTdT3'      |
|          | Anti-sense 5'CUUGAAGAAGUCGUGCUGCdTdT3' |
| p63 UTR1 | Sense 5'CAUCUGACCUGGCAUCUAAAdTdT3'     |
|          | Anti-sense 5'UUAGAUGCCAGGUCAGAUGdTdT3' |

### Supplementary table 5: Primers for QRT-PCR

| Target              | Primer  | Sequence 5'-3'              |
|---------------------|---------|-----------------------------|
| p63- $\alpha/\beta$ | Forward | 5' CAGCACCAGCACTTACTTCAGA3' |

|                |         |                              |
|----------------|---------|------------------------------|
| p63- $\alpha$  | Reverse | 5'CCACCTCGGTAAGAAACTGA3'     |
| p63- $\beta$   | Reverse | 5'TCAGACTTGCCAGATCCTGA3'     |
| p63- $\gamma$  | Forward | 5'ACAGGAAGGCGGATGAAGATAGCA3' |
| p63- $\gamma$  | Reverse | 5'GGCTCCACAAGCTCATTCT3'      |
| $\Delta$ N-p63 | Forward | 5'GGAAAACAATGCCCAGACTC3'     |
| $\Delta$ N-p63 | Reverse | 5'GTGGAATACGTCCAGGTGC3'      |
| TGF $\beta$ -1 | Forward | 5'GCCCTGGACACCAACTATTGC3'    |
| TGF $\beta$ -1 | Reverse | 5'GCACTTGCAGGAGCGCA3'        |
| TGF $\beta$ -2 | Forward | 5'ACGTGTTGAGAGATCGAGG3'      |
| TGF $\beta$ -2 | Reverse | 5'CCCAGCACTCAGTCAACGTC3'     |
| TGF $\beta$ -3 | Forward | 5'GTCACTGACACTGTGCGCGA3'     |
| TGF $\beta$ -3 | Reverse | 5'CTGGCCTCAGCTGCACTTAC3'     |
| Snail          | Forward | 5'CCTCCCTGTCAGATGAGGAC3'     |
| Snail          | Reverse | 5'GTTCCCTTATGGAGTCGGACC3'    |
| Slug           | Forward | 5'AGATGCATATTCGGACCCAC3'     |
| Slug           | Reverse | 5'CCTCATGTTTGTGCAGGAGA3'     |
| Twist          | Forward | 5'GGAGTCCGCAGTCTTACGAG3'     |
| Twist          | Reverse | 5'GGAGATGGTCCAGGAGGTCT3'     |
| RPLPO          | Forward | 5'ATCAACGGGTACAAACGAGTC3'    |
| RPLPO          | Reverse | 5'CAGATGGATCAGCCAAGAAGG3'    |
