# Supplementary material
Source: PubMed Central journal article supplement (PMC3030392)

Figure S1

A

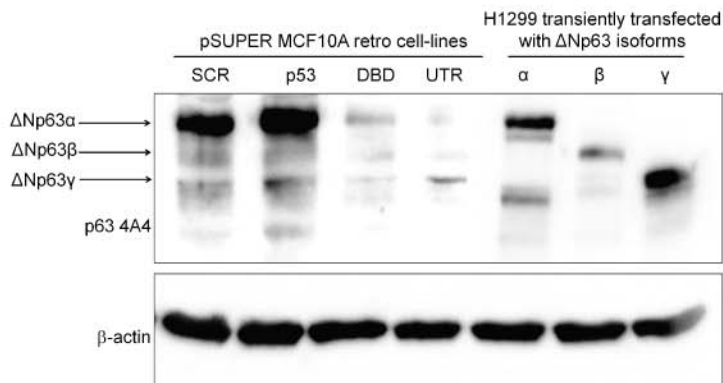

B

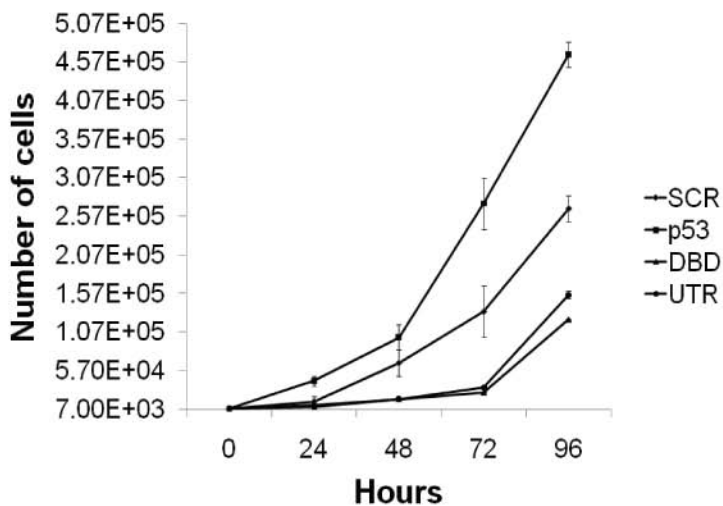

Figure S2

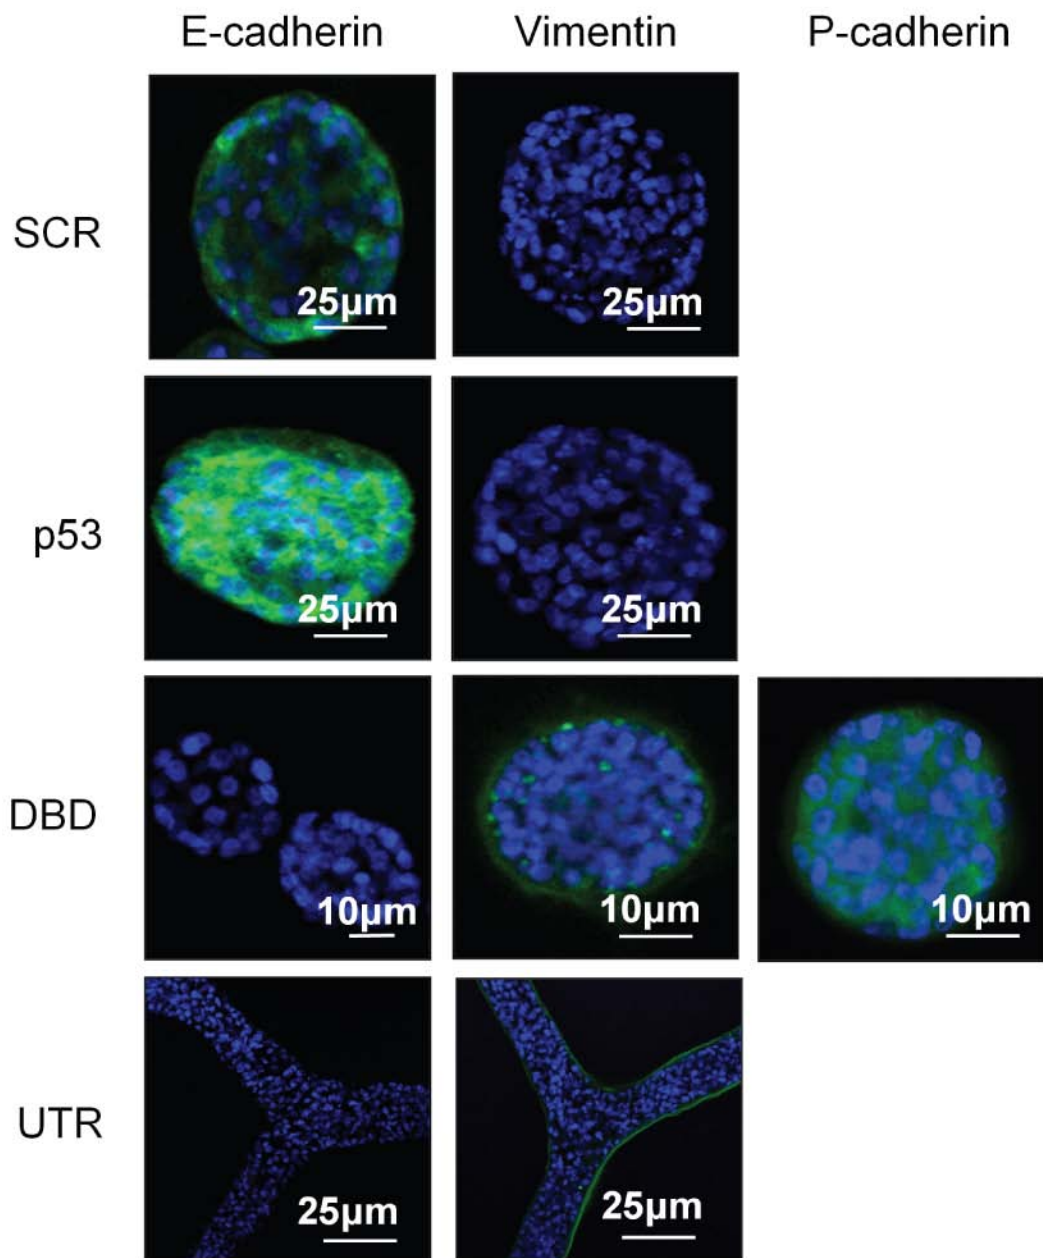

Figure S3

A

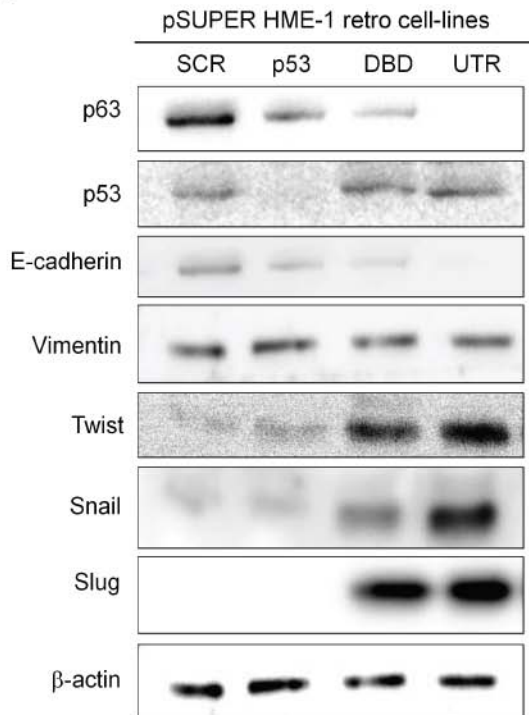

B

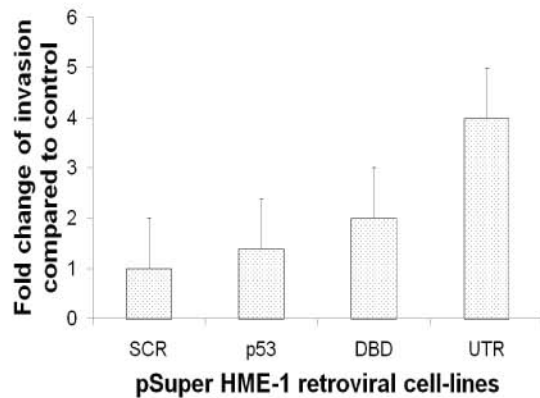

Figure S4

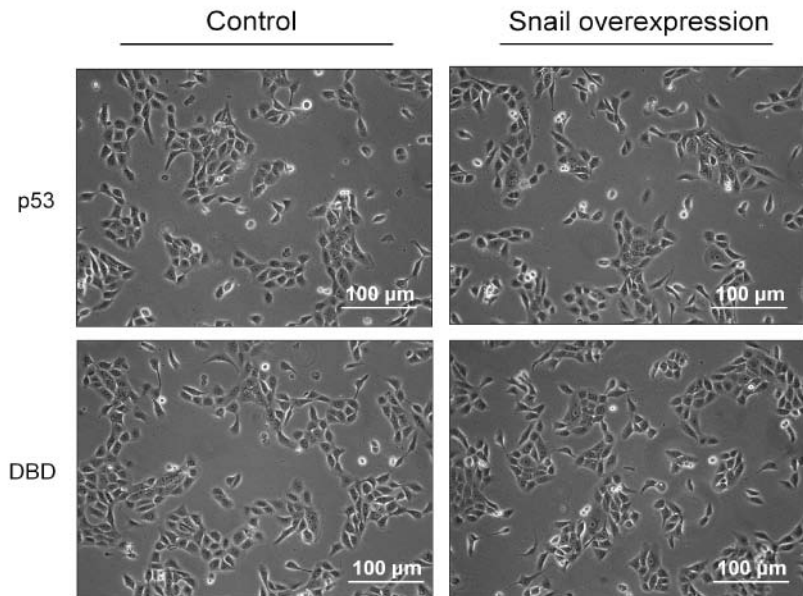

Figure S5

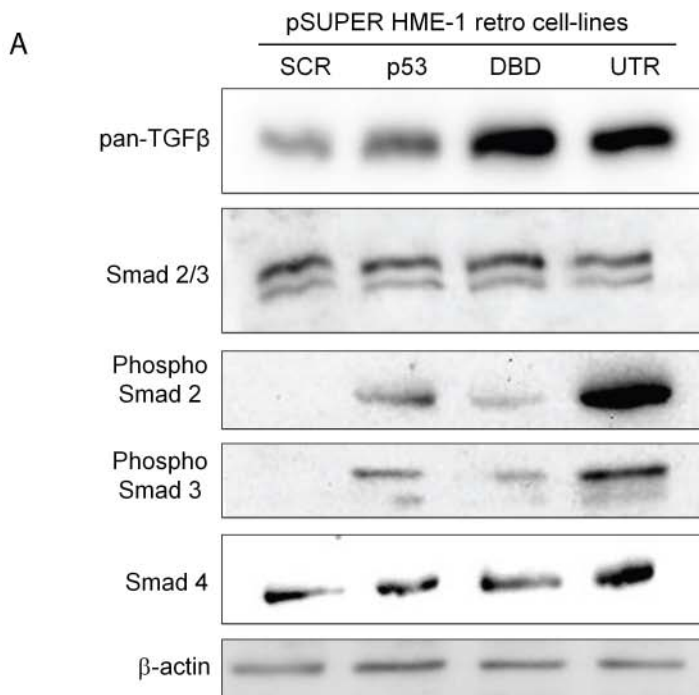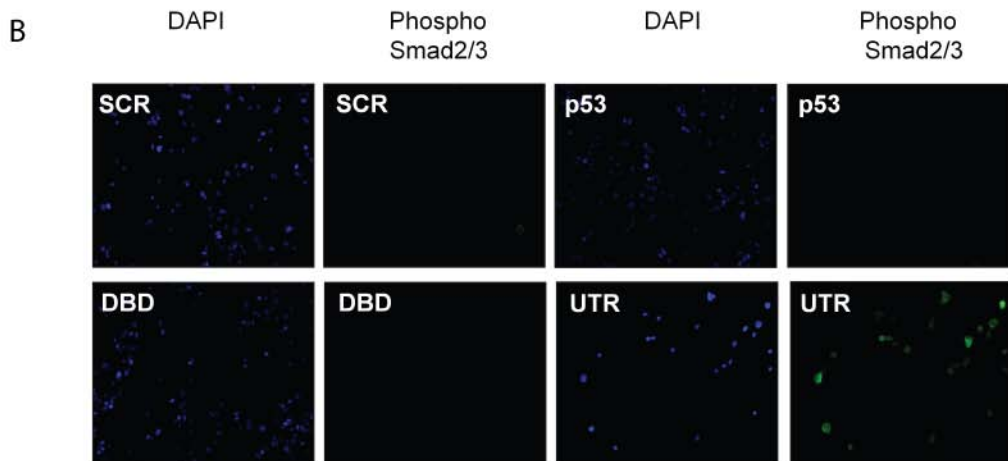

Supplement: supp_M110.162511_jbc.M110.162511-1.pdf [file supp_M110.162511_jbc.M110.162511-1.pdf]
